# Supplementary material
Source: PubMed Central journal article supplement (PMC2650316)
Supplement: 0810790106_0810790106SI.pdf [file 0810790106_0810790106SI.pdf]

# Supporting Information

Yu *et al.* 10.1073/pnas.0810790106

## SI Text

**Animal Studies.** All animal work was performed in accordance with protocols approved by the Institutional Animal Care and Use Committee of Fox Chase Cancer Center. Female ovariectomized CB17-*SCID* mice, 6–8 weeks of age, were purchased from Taconic. One week prior to ELT3 cell injection, 17-beta estradiol or placebo pellets (2.5 mg, 90-day release, Innovative Research America) were implanted. For xenograft tumor establishment,  $2 \times 10^6$  ELT3 cells were bilaterally injected into the rear flanks of the mice. For intravenous injections,  $2 \times 10^5$  ELT3 or ELT3-Luc cells were injected into the lateral tail vein. Lung metastases were scored from 5-micron H&E-stained sections of each lobe by observers blinded to the experimental conditions. CI-1040 (PD184352) was obtained from Pfizer and was prepared in a vehicle of 10% Cremophore EL (Sigma), 10% ethanol, and 80% water. RAD001 was obtained from Novartis Pharma and was diluted in double-distilled water. CI-1040 (150 mg/kg day by gavage, twice per day) or RAD001 (4 mg/kg per day by gavage) was initiated 1 day post-cell inoculation.

**Detection of ELT3 Cells by Real-Time PCR.** Mouse blood (0.5 mL) was collected at indicated times by intraocular bleed, and red blood cells were lysed before DNA extraction. At death, the lungs were dissected and stored at  $-80^\circ\text{C}$  for DNA extraction. Rat and mouse DNAs were quantified by using TaqMan-chemistry based real-time PCR assays. The assay for rat DNA was adapted from the method described by Walker *et al.* (1). The primers amplify a LINE repeat element (AC087102). The assay for mouse is for the gene *Anf*. The sequences (all 5' to 3') for the primers and probes are: Mouse Forward: GGCATCTTCTGCTGGCTCC; Reverse: GGCTA GAACCCTCCCCATTCT; Probe: 6FAM-CACTC-CATCGCTTTATCGCTGCAAGTG-BHQ1. Rat Forward: CAAGACGGATGATCAAAATGTG; Reverse: TCTCT-GTTTTAATCTTTGCTTCTCC; Probe: 6FAM-CCTGC-CAAGGTATTCTTTTTCCTCATTAA-BHQ1. PCR master mix from Eurogentec was used for PCR. Primers and probe concentrations were 500 and 100 nM, respectively. Cycling conditions were  $95^\circ\text{C}$ , 15 minutes followed by 40 (2-steps) cycles ( $95^\circ\text{C}$ , 15 sec;  $60^\circ\text{C}$ , 60 sec). Reactions were run using an ABI 7900 HT instrument. Each sample was analyzed using two different amounts of input DNA. Relative quantification was done using the  $2^{-\Delta\Delta C_t}$  method (2).

**Bioluminescent Reporter Imaging.** ELT3 cells were transfected with 3  $\mu\text{g}$  of pCMV-Luc (Invitrogen) using Nucleofection reagent (Amaxa) and selected with G418. Ten minutes prior to imaging, animals were injected with luciferin (Xenogen) (120 mg/kg, i.p.). Bioluminescent signals were recorded at indicated times post-cell injection using the Xenogen IVIS System (Xenogen). Total photon flux at the chest regions and from the dissected lungs was analyzed.

**Cell Culture and Reagents.** ELT-3 cells (Eker rat uterine leiomyoma-derived smooth muscle cells) were cultured in IIA complete

medium supplemented with 15% FBS. Prior to the *in vitro* experiments, cells were maintained in media supplemented with 10% charcoal-stripped FBS for 3 days and then serum-starved for 24 hours in serum- and phenol red-free medium. 17 beta-estradiol ( $E_2$ , 10 nM, Sigma) or PD98059 (50  $\mu\text{M}$ , Cell Signaling Technology) was added to the cells as indicated.

**Immunoblotting and Antibodies.** Cells were rinsed once in ice-cold PBS and lysed in PTY buffer (50mM Hepes, pH 7.5, 50 mM NaCl, 5 mM EDTA, 50 mM NaF, 10 mM  $\text{Na}_4\text{P}_2\text{O}_7$ , and 1% Triton) supplemented with phosphatase inhibitors. Lysates were resolved by SDS/PAGE electrophoresis and transferred onto Immobilon P membranes (Millipore). Cytoplasmic and nuclear fractions were separated using CellLytic Nuclear Extraction Kit (Sigma) before electrophoresis. The following antibodies were used for Western blot analysis: anti-Bim (Affinity BioReagents), anti-S6, anti-phospho-S6 (S235/236), anti-phospho-S6K (T389), anti-phospho-p42/44 MAPK (T202/Y204), anti-p42/44MAPK, anti-ELK1, anti-cleaved caspase 3 (all from Cell Signaling Technology), anti-Ki67 and antismooth muscle actin (BioGenex), anti-alpha-tubulin and anti-beta-actin (Sigma), anti-phospho-Raf-1 (S338) (Upstate Biotechnology), and anti-Raf-1 (Santa Cruz Biotechnology). Western blots were developed using horseradish peroxidase-conjugated secondary antibodies and ECL chemiluminescence (Amersham Biosciences).

**Immunohistochemistry.** Sections were deparaffinized, incubated overnight with primary antibodies at  $4^\circ\text{C}$  in a humidified chamber and then rinsed and incubated with biotinylated secondary antibodies for 30 minutes at room temperature. Slides were developed using the Broad Spectrum AEC Histostain-Plus (Invitrogen) or Histostain-Plus kit (Invitrogen), and they were counterstained with Gill's hematoxylin.

**Anoikis Assay.** ELT3 cells were cultured with or without 10 nM  $E_2$  in serum free and phenol-red free medium supplemented with 10% charcoal-stripped FBS for 24 hours. Cells were harvested, plated onto  $60 \times 15$  mm style Poly-hydroxyethyl methacrylate (PolyHEMA) culture dishes (Corning Incorporated) at a density of  $1 \times 10^6$  cells/mL with or without  $E_2$ . Cell death as a function of DNA fragmentation was detected using Cell Death Detection ELISA kit (Roche Diagnostics).

**Thymidine Incorporation.** The surviving cells in suspension were plated in triplicate in 24-well plates and allowed to grow adherently for 24 hours.  $^3\text{H}$ -thymidine (1  $\mu\text{Ci}$ ) was added to the media and the cells were incubated at  $37^\circ\text{C}$  for 6 hours, washed with PBS, and lysed in 0.5 mL of 0.5 N NaOH plus 0.5% SDS.  $^3\text{H}$ -thymidine incorporation was measured by scintillation counting.

**Statistical Analyses.** Statistical analyses were performed using Student's *t* test when comparing 2 groups. Results are presented as means + SD of experiments performed in triplicate. Differences were considered significant at  $P < 0.05$ .

1. Walker JA, *et al.* (2004) Quantitative PCR for DNA identification based on genome-specific interspersed repetitive elements. *Genomics* 83:518–527.

2. Livak, KJ, Schmittgen TD (2001) Analysis of relative gene expression data using real-time quantitative PCR and the 212-Delta Delta C(T) method. *Methods* 25:402–408.
